# Supplementary material
Source: PubMed Central journal article supplement (PMC9371587)
Supplement: mmc1.pdf [file mmc1.pdf]

# THE LANCET

## Infectious Diseases

### Supplementary appendix

This appendix formed part of the original submission and has been peer reviewed. We post it as supplied by the authors.

Supplement to: Sadarangani M, Soe P, Shulha HP, et al. Safety of COVID-19 vaccines in pregnancy: a Canadian National Vaccine Safety (CANVAS) network cohort study. *Lancet Infect Dis* 2022; published online Aug 11. [https://doi.org/10.1016/S1473-3099\(22\)00426-1](https://doi.org/10.1016/S1473-3099(22)00426-1).

## Appendix

**Supplementary Table 1. Characteristics of females aged 15-49 years in the CANVAS-COVID-19 study**

|                     | Dose 1*          |                           |                   |                   |                   | Dose 2*                  |                   |                   |                   |
|---------------------|------------------|---------------------------|-------------------|-------------------|-------------------|--------------------------|-------------------|-------------------|-------------------|
|                     | Control<br>N (%) | All vaccine type<br>N (%) | BNT162b2<br>N (%) | mRNA-1273<br>N(%) | ChAdOx1-S<br>N(%) | All vaccine type<br>N(%) | BNT162b2<br>N (%) | mRNA-1273<br>N(%) | ChAdOx1-S<br>N(%) |
| <b>Total N</b>      | 6,179(100)       | 191,360(100)              | 110,535(100)      | 69,827(100)       | 10,857(100)       | 94,937(100)              | 54,969(100)       | 39,270(100)       | 631(100)          |
| <b>Non-pregnant</b> | 5840(94.5)       | 185,735(97.1)             | 107,121(96.9)     | 67,644(96.9)      | 10,832(99.8)      | 91,823(96.7)             | 53,077(96.6)      | 38,054(96.9)      | 625(99.2)         |
| <b>Pregnant</b>     | 339(5.5)         | 5,625(2.9)                | 3,414(3.1)        | 2,183(3.1)        | 25(0.2)           | 3,114(3.3)               | 1,892(3.4)        | 1,216(3.1)        | 6(0.8)            |
| <b>Trimester</b>    |                  |                           |                   |                   |                   |                          |                   |                   |                   |
| First               | 105(1.7)         | 1,297(0.7)                | 802(0.8)          | 487(0.7)          | 7 (0.1)           | 956(1.0)                 | 568(1.0)          | 385(1.0)          | 3(0.3)            |
| Second              | 144(2.3)         | 2,409(1.3)                | 1,473(1.3)        | 924(1.3)          | 11(0.1)           | 1,037(1.1)               | 636(1.2)          | 399(1.0)          | 2(0.3)            |
| Third               | 90(1.5)          | 1,917(1.0)                | 1,139(1.0)        | 770(1.1)          | 7(0.1)            | 1,119(1.2)               | 687(1.2)          | 431(1.1)          | 1(0.1)            |
| Unknown             | 0                | 2(0.0)                    | 0                 | 2(0.0)            | 0                 | 2(0.0)                   | 1(0.0)            | 1(0.0)            | 0                 |

\*There were 141 females with unknown vaccine type in dose one and 67 females in dose two.

**Supplementary Table 2. Significant and serious health event rates by vaccine type among vaccinated and unvaccinated (controls) pregnant females, and onset and duration of significant health events**

|                                              | Dose 1           |                   |                   |                    | Dose 2            |                   |                    |
|----------------------------------------------|------------------|-------------------|-------------------|--------------------|-------------------|-------------------|--------------------|
|                                              | Control<br>N (%) | Any mRNA<br>N (%) | BNT162b2<br>N (%) | mRNA-1273<br>N (%) | Any mRNA<br>N (%) | BNT162b2<br>N (%) | mRNA-1273<br>N (%) |
| <b>Sample size</b>                           | 339              | 5597              | 3414              | 2183               | 3108              | 1892              | 1216               |
| <b>Significant health events</b>             | 11(3·2)          | 226(4·0)          | 137(4·0)          | 89(4·1)            | 227(7·3)          | 80(4·2)           | 147(12·1)          |
| <b>Onset of significant health events</b>    |                  |                   |                   |                    |                   |                   |                    |
| Within 60 minutes                            | 0(0·0)           | 12(5·3)           | 8(5·8)            | 4(4·5)             | 4(1·8)            | 1(1·3)            | 3(2·0)             |
| 1-24 hours                                   | 2(18·2)          | 118(52·2)         | 69(50·4)          | 49(55·1)           | 183(80·6)         | 55(68·8)          | 128(87·1)          |
| 2-3 days                                     | 0(0·0)           | 55(24·3)          | 34(24·8)          | 21(23·6)           | 26(11·5)          | 14(17·5)          | 12(8·2)            |
| 4-5 days                                     | 3(27·3)          | 22(9·7)           | 12(8·8)           | 10(11·2)           | 5(2·2)            | 3(3·8)            | 2(1·4)             |
| 6-7 days                                     | 4(36·4)          | 11(4·9)           | 9(6·6)            | 2(2·2)             | 4(1·8)            | 4(5·0)            | 0(0·0)             |
| 8+ days                                      | 2(18·2)          | 7(3·1)            | 4(2·9)            | 3(3·4)             | 5(2·2)            | 3(3·8)            | 2(1·4)             |
| <b>Duration of significant health events</b> |                  |                   |                   |                    |                   |                   |                    |
| Within 60 minutes                            | 0(0·0)           | 6(2·7)            | 4(2·9)            | 2(2·2)             | 2(0·9)            | 1(1·3)            | 1(0·7)             |
| 1-10 hours                                   | 0(0·0)           | 17(7·5)           | 14(10·2)          | 3(3·4)             | 15(6·6)           | 6(7·5)            | 9(6·1)             |
| 11-24 hours                                  | 0(0·0)           | 46(20·4)          | 29(21·2)          | 17(19·1)           | 84(37·0)          | 29(36·3)          | 55(37·4)           |
| 2-3 days                                     | 1(9·1)           | 55(24·3)          | 32(23·4)          | 23(25·8)           | 67(29·5)          | 19(23·8)          | 48(32·7)           |
| 4-5 days                                     | 1(9·1)           | 33(14·6)          | 17(12·4)          | 16(18·0)           | 18(7·9)           | 6(7·5)            | 12(8·2)            |
| 6+ days                                      | 0(0·0)           | 17(7·5)           | 12(8·8)           | 5(5·6)             | 25(11·0)          | 11(13·8)          | 14(9·5)            |
| Ongoing                                      | 9(81·8)          | 51(22·6)          | 28(20·4)          | 23(25·8)           | 16(7·0)           | 8(10·0)           | 8(5·4)             |

**Supplementary Table 3. Reported diagnosis for serious health event rates by vaccine type among vaccinated and unvaccinated pregnant females**

|                              | Dose 1           |                   |                   |                    | Dose 2            |                   |                    |
|------------------------------|------------------|-------------------|-------------------|--------------------|-------------------|-------------------|--------------------|
|                              | Control<br>N (%) | Any mRNA<br>N (%) | BNT162b2<br>N (%) | mRNA-1273<br>N (%) | Any mRNA<br>N (%) | BNT162b2<br>N (%) | mRNA-1273<br>N (%) |
| <b>Sample size</b>           | 339              | 5597              | 3414              | 2183               | 3108              | 1892              | 1216               |
| <b>Serious health events</b> | 2(0.6)           | 31(0.6)           | 18(0.5)           | 13(0.6)            | 19(0.6)           | 8(0.4)            | 11(0.9)            |
| <b>Reported diagnosis</b>    |                  |                   |                   |                    |                   |                   |                    |
| Anaphylaxis                  | 0                | 5(16.1)           | 3(16.7)           | 2(15.4)            | 2(10.5)           | 0                 | 2(18.2)            |
| Sepsis                       | 0                | 0                 | 0                 | 0                  | 1(5.3)            | 0                 | 1(9.1)             |
| Coagulation                  | 0                | 1(3.2)            | 0                 | 1(7.7)             | 0                 | 0                 | 0                  |
| Pulmonary Embolism           | 0                | 1(3.2)            | 0                 | 1(7.7)             | 0                 | 0                 | 0                  |
| Bell's Palsy                 | 0                | 0                 | 0                 | 0                  | 1(5.3)            | 1(12.5)           | 0                  |
| Severe Morning sickness      | 0                | 1(3.2)            | 0                 | 1(7.7)             | 0                 | 0                 | 0                  |
| Pre-term labor               | 0                | 1(3.2)            | 1(5.6)            | 0                  | 2(10.5)           | 1(12.5)           | 1(9.1)             |
| Still birth                  | 0                | 0                 | 0                 | 0                  | 1(5.3)            | 1(12.5)           | 0                  |
| Miscarriage                  | 0                | 1(3.2)            | 0                 | 1(7.7)             | 3(15.8)           | 0                 | 3(27.3)            |
| Abruptio placenta            | 0                | 2(6.5)            | 2(11.1)           | 0                  | 2(10.5)           | 2(25.0)           | 0                  |
| Fibroid pain                 | 0                | 2(6.5)            | 2(11.1)           | 0                  | 0                 | 0                 | 0                  |
| COVID-19 infection           | 1(50.0)          | 1(3.2)            | 1(5.6)            | 0                  | 0                 | 0                 | 0                  |
| Oral Thrush                  | 0                | 0                 | 0                 | 0                  | 1(5.3)            | 1(12.5)           | 0                  |
| Muscle soreness              | 0                | 0                 | 0                 | 0                  | 1(5.3)            | 1(12.5)           | 0                  |
| Kidney stones/Cholestasis    | 0                | 2(6.5)            | 2(11.1)           | 0                  | 0                 | 0                 | 0                  |
| Anxiety attack               | 0                | 1(3.2)            | 0                 | 1(7.7)             | 0                 | 0                 | 0                  |
| No diagnosis                 | 1(50.0)          | 12(38.7)          | 7(38.9)           | 5(38.5)            | 5(26.3)           | 1(12.5)           | 4(36.4)            |
| Prefer not to answer         | 0                | 1(3.2)            | 0                 | 1(7.7)             | 0                 | 0                 | 0                  |

Serious health event: any event resulting in emergency department visit and/or hospitalization in the previous seven days

**Supplementary Table 4. Results of primary and sensitivity analyses assessing the relationship between vaccination status and significant health events among pregnant people**

|                                         | Dose 1                 |                       | Dose 2                 |                       |
|-----------------------------------------|------------------------|-----------------------|------------------------|-----------------------|
|                                         | Unadjusted OR (95% CI) | Adjusted aOR*(95% CI) | Unadjusted OR (95% CI) | Adjusted aOR*(95% CI) |
| <b>Primary analysis<sup>a</sup>:</b>    |                        |                       |                        |                       |
| Any mRNA                                | 1.25[0.68 – 2.32]      | 1.32[0.71 – 2.46]     | 2.35[1.27 – 4.35]      | 2.42[1.31 – 4.49]     |
| BNT162b2                                | 1.25[0.67 – 2.33]      | 1.26[0.67 – 2.37]     | 1.32[0.69 – 2.50]      | 1.27[0.67 – 2.42]     |
| mRNA-1273                               | 1.27[0.67 – 2.40]      | 1.45[0.76 – 2.76]     | 4.10[2.19 – 7.66]      | 4.44[2.37 – 8.31]     |
| <b>Sensitivity analysis<sup>b</sup></b> |                        |                       |                        |                       |
| Any mRNA                                | 1.18 [0.43 -3.25]      | 1.22[0.44 – 3.36]     | 1.29[0.46 – 3.59]      | 1.26[0.45 – 3.52]     |
| BNT162b2                                | 1.12[0.40 – 3.13]      | 1.11[0.39 – 3.12]     | 0.99[0.34 – 2.88]      | 0.90[0.31 – 2.64]     |
| mRNA-1273                               | 1.29[0.45 – 3.65]      | 1.41[0.49 – 4.07]     | 1.76[0.61 – 5.09]      | 1.81[0.62 – 5.28]     |

<sup>a</sup>Primary end point (significant health event): a new or worsening of a health event sufficient to cause work/school absenteeism, medical consultation and/or prevent daily activities in the previous seven days

<sup>b</sup>Severe health event: a new or worsening of a health event resulting medical consultation in the previous seven days

\*Reference: unvaccinated pregnant control; adjusted for age groups, trimester and previous COVID-19 infection

**Supplementary Table 5. Results of primary and sensitivity analyses assessing the relationship between pregnancy status and significant health events among vaccinated people**

|                                         | Dose 1                 |                        | Dose 2                 |                        |
|-----------------------------------------|------------------------|------------------------|------------------------|------------------------|
|                                         | Unadjusted OR (95% CI) | Adjusted aOR* (95% CI) | Unadjusted OR (95% CI) | Adjusted aOR* (95% CI) |
| <b>Primary analysis<sup>a</sup>:</b>    |                        |                        |                        |                        |
| Any mRNA                                | 0.63[0.55 – 0.72]      | 0.63[0.55 – 0.72]      | 0.62[0.54 – 0.71]      | 0.62[0.54 – 0.71]      |
| BNT162b2                                | 0.65[0.54 – 0.77]      | 0.63[0.53 – 0.75]      | 0.52[0.42 – 0.66]      | 0.52[0.41 – 0.65]      |
| mRNA-1273                               | 0.60[0.49 – 0.75]      | 0.62[0.50 – 0.77]      | 0.72[0.60 – 0.85]      | 0.72[0.60 – 0.85]      |
| <b>Sensitivity analysis<sup>b</sup></b> |                        |                        |                        |                        |
| Any mRNA                                | 1.00[0.80 – 1.25]      | 1.01[0.80 – 1.27]      | 1.10[0.82 – 1.47]      | 1.10[0.82 – 1.47]      |
| BNT162b2                                | 1.01[0.75 – 1.37]      | 1.00[0.74 – 1.35]      | 0.93[0.61 – 1.43]      | 0.91[0.59 – 1.39]      |
| mRNA-1273                               | 0.98[0.69 – 1.38]      | 1.01[0.71 – 1.43]      | 1.32[0.88 – 1.98]      | 1.35[0.90 – 2.02]      |

<sup>a</sup>Primary end point (significant health event): a new or worsening of a health event sufficient to cause work/school absenteeism, medical consultation and/or prevent daily activities in the previous seven days following each dose of vaccine

<sup>b</sup>Severe health event: a new or worsening of a health event resulting medical consultation in the previous seven days following each dose of vaccine

\*Reference: vaccinated non-pregnant women; adjusted for age groups and previous COVID-19 infection
